# Supplementary material for: Cord Blood Adductomics Reveals Oxidative Stress Exposure Pathways of Bronchopulmonary Dysplasia
Source: MDPI journal article supplement (doi:10.3390/antiox13040494), 2024-04-20
Supplement: s1 [file s1]

**Table S1. Putative HSA-Cys<sup>34</sup> adducts in cord and peripheral blood plasma.**

| Adduct | Putative Annotation                                                                          | Known / Unknown | Elemental composition of added mass                                  | m/z    | Added Mass (Da) | HRMS Retention Time (min) | QQQ Retention Time (min) | PAR (× 1,000) <sup>a</sup> | Concentration (pmol/mg HSA) <sup>b</sup> | References                     |
|--------|----------------------------------------------------------------------------------------------|-----------------|----------------------------------------------------------------------|--------|-----------------|---------------------------|--------------------------|----------------------------|------------------------------------------|--------------------------------|
| A001   | -Lys from C-terminus                                                                         | Known           | -Lys                                                                 | 769.59 | -128.10         | 38.48                     | 6.80                     | 0.107                      | 0.010                                    | [37, 49]                       |
| A002   | Cys <sup>34</sup> →Gly                                                                       | Known           | -CH <sub>2</sub> S                                                   | 796.96 | -45.99          | 27.50                     | 4.75                     | 0.405                      | 0.040                                    | [14, 30, 31, 33, 34, 35, 37]   |
| A003   | Cys <sup>34</sup> →Dehydroalanine                                                            | Known           | -SH <sub>2</sub>                                                     | 800.96 | -33.99          | 28.40                     | 5.20                     | 0.014                      | 0.001                                    | [14, 30, 31, 33]               |
| A004   | Cys <sup>34</sup> → Oxoalanine or formylglycine                                              | Known           | -SH <sub>2</sub> , +O                                                | 806.29 | -18.00          | 27.20                     | 5.60                     | 0.101                      | 0.010                                    | [14, 30, 31,33,34,35]          |
| A005   | T3 dimer                                                                                     | Known           | +C <sub>114</sub> H <sub>172</sub> N <sub>27</sub> O <sub>30</sub> S | 811.42 | 2431.25         | 30.37                     | 5.25                     | 627.152                    | 61.394                                   | [14, 28, 30, 31,33, 32]        |
| A006   | Unmodified T3                                                                                | Known           | +H                                                                   | 812.29 | 1.01            | 28.60                     | 5.16                     | 568.851                    | 55.687                                   | [14, 28, 30, 31,32, 33, 34]    |
| A007   | CH <sub>2</sub> crosslink                                                                    | Known           | +CH <sub>2</sub> O, -H <sub>2</sub> O                                | 815.95 | 12.00           | 25.61                     | 3.10                     | 1.067                      | 0.104                                    | [34, 35]                       |
| A008   | Cys <sup>34</sup> -Gln cross-link (monooxidation), Cys <sup>34</sup> Sulfinamide             | Known           | -H <sub>2</sub> , +O                                                 | 816.65 | 13.98           | 29.68                     | 5.20                     | 24.267                     | 2.376                                    | [14, 28, 30, 31,32,33, 34,35]  |
| A009   | Methylation (not at Cys34)                                                                   | Known           | +CH <sub>3</sub>                                                     | 816.96 | 15.02           | 29.10                     | 5.32                     | 19.704                     | 1.929                                    | [14, 28, 30, 31,32, 33,34,35]  |
| A010   | S-Sodiation                                                                                  | Known           | +Na                                                                  | 819.62 | 22.99           | 26.70                     | 5.16                     | 29.622                     | 2.900                                    | [28, 33, 34, 35,]              |
| A011   | S-Cyanylation                                                                                | Known           | +CN                                                                  | 820.62 | 26.00           | 28.80                     | 5.20                     | 1.680                      | 0.164                                    | [14, 30, 31, 32, 34, 35]       |
| A012   | dehydrated form of Cys <sup>34</sup> sulfinic acid plus methylation (not Cys <sup>34</sup> ) | Known           | +CHO                                                                 | 821.96 | 28.99           | 30.10                     | 4.90                     | 0.020                      | 0.002                                    | [32]                           |
| A013   | dehydrated form of Cys <sup>34</sup> sulfonic acid (trioxidation)                            | Known           | -H <sub>2</sub> , +O <sub>2</sub>                                    | 822.62 | 30.97           | 30.29                     | 5.00                     | 1.287                      | 0.126                                    | [32]                           |
| A014   | Cys <sup>34</sup> sulfinic acid (dioxidation)                                                | Known           | +HO <sub>2</sub>                                                     | 822.95 | 32.99           | 29.68                     | 4.42                     | 1.073                      | 0.105                                    | [14, 28, 30, 31, 32, 33,34,35] |
| A015   | K adduct of T3                                                                               | Known           | -H+K                                                                 | 824.94 | 38.96           | 28.51                     | 5.16                     | 1.108                      | 0.109                                    | [33, 35]                       |
| A016   | Ethylene oxide adduct                                                                        | Known           | +C <sub>2</sub> H <sub>5</sub> O                                     | 826.97 | 45.03           | 27.90                     | 5.10                     | 0.241                      | 0.024                                    | [14, 28, 30]                   |

|      |                                                                           |       |                                                 |        |        |       |      |       |       |                                  |
|------|---------------------------------------------------------------------------|-------|-------------------------------------------------|--------|--------|-------|------|-------|-------|----------------------------------|
| A017 | S-Methylthiolation                                                        | Known | +CH <sub>3</sub> S                              | 827.62 | 47.00  | 28.80 | 4.99 | 0.070 | 0.007 | [28, 30, 31,33, 34]              |
| A018 | S-Methylthiolation                                                        | Known | +CH <sub>3</sub> S                              | 827.62 | 47.00  | 28.80 | 4.99 | 0.055 | 0.005 | [28, 30, 31,33, 34]              |
| A019 | S-(O)-O-CH <sub>3</sub>                                                   | Known | +CH <sub>3</sub> O <sub>2</sub>                 | 827.63 | 47.01  | 27.46 | 5.10 | 0.633 | 0.062 | [28, 30, 31]                     |
| A020 | Cys <sup>34</sup> sulfinic acid plus methylation (not Cys <sup>34</sup> ) | Known | +HO <sub>2</sub> , +CH <sub>2</sub>             | 827.96 | 47.00  | 30.10 | 5.20 | 1.229 | 0.120 | [30, 32]                         |
| A021 | S-Methylthiolation                                                        | Known | +CH <sub>3</sub> S                              | 827.99 | 47.00  | -     | -    | 0.319 | 0.031 | -                                |
| A022 | Cys <sup>34</sup> sulfonic acid (trioxidation)                            | Known | +HO <sub>3</sub>                                | 828.29 | 48.99  | 29.93 | 4.49 | 1.038 | 0.102 | [14, 28, 30, 31, 32, 33, 34, 35] |
| A023 | Acrylonitrile adduct                                                      | Known | +C <sub>3</sub> H <sub>4</sub> N                | 829.97 | 54.04  | 28.90 | 5.00 | 3.856 | 0.378 | [14, 28, 30]                     |
| A024 | Na adduct of Cys <sup>34</sup> sulfinic acid                              | Known | +HO <sub>2</sub> +Na-H                          | 830.62 | 54.98  | 27.25 | 4.50 | 0.330 | 0.032 | [14]                             |
| A025 | Putative S-addition of acrolein                                           | Known | +C <sub>3</sub> H <sub>5</sub> O                | 830.96 | 57.03  | 25.90 | 3.20 | 0.184 | 0.018 | [34, 35]                         |
| A026 | Methylisocyanate adduct                                                   | Known | +C <sub>2</sub> H <sub>4</sub> NO               | 831.30 | 58.03  | 27.50 | 5.00 | 1.702 | 0.167 | [14, 30]                         |
| A027 | S-Addition of SO <sub>2</sub>                                             | Known | +HO <sub>2</sub> S                              | 833.64 | 64.97  | 27.80 | 5.10 | 0.087 | 0.008 | [30, 31]                         |
| A028 | S-Addition of crotonaldehyde                                              | Known | +C <sub>4</sub> H <sub>7</sub> O                | 835.64 | 71.05  | 28.20 | 5.28 | 0.636 | 0.062 | [14, 28, 30, 31, 34, 35]         |
| A029 | S-Phenylation                                                             | Known | +C <sub>6</sub> H <sub>5</sub>                  | 837.63 | 77.04  | 27.40 | 4.80 | 0.084 | 0.008 | [30, 31]                         |
| A030 | S-Addition of tiglic aldehyde                                             | Known | +C <sub>5</sub> H <sub>9</sub> O                | 840.31 | 85.06  | 27.70 | 4.90 | 0.132 | 0.013 | [30, 31, 34]                     |
| A031 | S-Addition of pyruvate or malonate semialdehyde                           | Known | +C <sub>3</sub> H <sub>5</sub> O <sub>3</sub>   | 841.63 | 89.02  | 28.50 | 4.90 | 0.571 | 0.056 | [30, 33, 32]                     |
| A032 | S-Addition of mercaptoacetic acid                                         | Known | +C <sub>2</sub> H <sub>3</sub> O <sub>2</sub> S | 842.28 | 90.98  | 28.60 | 4.95 | 1.130 | 0.111 | [14, 28, 30, 31,33, 32]          |
| A033 | S-Mercaptoacetamide                                                       | Known | +C <sub>2</sub> H <sub>4</sub> NOS              | 842.33 | 90.00  | 27.80 | 4.95 | 1.090 | 0.107 | [14, 30]                         |
| A034 | S-Addition of Cys (-H <sub>2</sub> O)                                     | Known | +C <sub>3</sub> H <sub>4</sub> NOS              | 845.95 | 102.00 | 27.70 | 4.15 | 2.020 | 0.198 | [14, 28, 30, 31, 33, 32]         |
| A035 | S-Cys (possibly NH <sub>2</sub> → OH, -H <sub>2</sub> O)                  | Known | +C <sub>3</sub> H <sub>3</sub> O <sub>2</sub> S | 846.66 | 102.98 | 28.60 | 5.70 | 0.003 | 0.000 | [30, 33]                         |
| A036 | S-addition of benzaldehyde or quinone methide                             | Known | +C <sub>7</sub> H <sub>7</sub> O                | 847.64 | 107.05 | 31.58 | 5.50 | 0.100 | 0.010 | [14, 30, 32, 33]                 |
| A037 | S-Methylethyl-sulfonylation                                               | Known | +C <sub>3</sub> H <sub>7</sub> O <sub>2</sub> S | 848.00 | 107.01 | 26.70 | 4.70 | 0.003 | 0.000 | [30, 31]                         |
| A038 | S-Addition of S <sub>2</sub> O <sub>3</sub> H                             | Known | +HO <sub>3</sub> S <sub>2</sub>                 | 849.66 | 112.94 | 28.00 | 5.00 | 0.177 | 0.017 | [14, 30, 31]                     |

|      |                                                    |         |                                                                                |        |        |       |      |         |        |                                  |
|------|----------------------------------------------------|---------|--------------------------------------------------------------------------------|--------|--------|-------|------|---------|--------|----------------------------------|
| A039 | S-Addition of hCys (-H <sub>2</sub> O)             | Known   | +C <sub>4</sub> H <sub>6</sub> NOS                                             | 850.63 | 116.02 | 27.90 | 4.30 | 0.007   | 0.001  | [14, 28, 30, 31, 33, 34, 35]     |
| A040 | S-Cys                                              | Known   | +C <sub>3</sub> H <sub>6</sub> NO <sub>2</sub> S                               | 851.96 | 120.01 | 26.36 | 3.57 | 393.568 | 38.528 | [14, 28, 30, 31, 32, 33, 34]     |
| A041 | S-Addition of Cys (NH <sub>2</sub> →OH)            | Known   | +C <sub>3</sub> H <sub>5</sub> O <sub>3</sub> S                                | 852.67 | 121.00 | 27.80 | 3.60 | 109.060 | 10.676 | [14, 28, 30, 31, 32, 33]         |
| A042 | S-Addition of BDE                                  | Known   | +C <sub>6</sub> H <sub>9</sub> O <sub>3</sub>                                  | 854.97 | 129.05 | 25.90 | 3.20 | 0.007   | 0.001  | [30, 31]                         |
| A043 | Oxindole                                           | Known   | +C <sub>8</sub> H <sub>6</sub> NO                                              | 855.97 | 132.04 | 29.00 | 3.80 | 0.250   | 0.024  | [30, 33]                         |
| A044 | S-Addition of hCys                                 | Known   | +C <sub>4</sub> H <sub>8</sub> NO <sub>2</sub> S                               | 856.63 | 134.02 | 27.00 | 3.62 | 23.199  | 2.271  | [14, 28, 30, 31, 32, 33, 34]     |
| A045 | S-Addition of Cys, methylation                     | Known   | +C <sub>4</sub> H <sub>8</sub> NO <sub>2</sub> S                               | 856.63 | 134.02 | -     | 3.60 | 25.351  | 2.482  | -                                |
| A046 | S-Addition of hCys (NH <sub>2</sub> →OH)           | Known   | +C <sub>4</sub> H <sub>7</sub> O <sub>3</sub> S                                | 857.34 | 135.01 | 27.15 | 3.70 | 1.293   | 0.127  | [28, 30, 31]                     |
| A047 | Na adduct of S-Cys                                 | Known   | +C <sub>3</sub> H <sub>6</sub> NO <sub>2</sub> S+Na-H                          | 859.28 | 141.99 | 28.71 | 3.57 | 21.324  | 2.087  | [14, 28, 31, 33, 32]             |
| A048 | S-hCys plus methylation (not Cys <sup>34</sup> )   | Known   | +C <sub>4</sub> H <sub>8</sub> NO <sub>2</sub> S+CH <sub>2</sub>               | 861.35 | 148.03 | 29.30 | 3.80 | 0.992   | 0.097  | [28, 30, 32, 33]                 |
| A049 | S-Addition of CysGly (-H <sub>2</sub> O)           | Known   | +C <sub>5</sub> H <sub>7</sub> N <sub>2</sub> O <sub>2</sub> S                 | 865.01 | 159.02 | 27.50 | 3.60 | 2.651   | 0.260  | [30, 31]                         |
| A050 | S-(N-acetyl)Cys                                    | Known   | +C <sub>5</sub> H <sub>8</sub> NO <sub>3</sub> S                               | 866.01 | 162.02 | 28.30 | 5.40 | 0.673   | 0.066  | [14, 30, 32, 33]                 |
| A051 | S-Addition of CysGly                               | Known   | +C <sub>5</sub> H <sub>9</sub> N <sub>2</sub> O <sub>3</sub> S                 | 870.97 | 177.03 | 26.50 | 3.30 | 40.189  | 3.934  | [14, 28, 30, 31, 32, 33, 34, 35] |
| A052 | S-CysGly plus methylation (not Cys <sup>34</sup> ) | Known   | +C <sub>5</sub> H <sub>9</sub> N <sub>2</sub> O <sub>3</sub> S+CH <sub>2</sub> | 875.64 | 191.04 | 27.50 | 3.40 | 1.696   | 0.166  | [30, 33, 32]                     |
| A053 | Na adduct of S-CysGly                              | Known   | +C <sub>5</sub> H <sub>9</sub> N <sub>2</sub> O <sub>3</sub> S+Na-H            | 878.68 | 199.01 | 26.10 | 3.20 | 1.351   | 0.132  | [33]                             |
| A054 | K Adduct of S-CysGly                               | Known   | +C <sub>5</sub> H <sub>9</sub> N <sub>2</sub> O <sub>3</sub> S+K-H             | 884.05 | 214.98 | 25.36 | 3.10 | 0.124   | 0.012  | [31, 33]                         |
| A055 | S-Addition of GluCys                               | Known   | +C <sub>8</sub> H <sub>13</sub> N <sub>2</sub> O <sub>5</sub> S                | 894.97 | 249.05 | 27.00 | 3.68 | 0.552   | 0.054  | [13, 28, 30, 31, 32, 33]         |
| A056 | S-Addition of GSH                                  | Known   | +C <sub>10</sub> H <sub>16</sub> N <sub>3</sub> O <sub>6</sub> S               | 913.98 | 306.07 | 26.90 | 3.54 | 0.678   | 0.066  | [14, 28, 30, 31, 32, 33, 34, 35] |
| A057 | Unknown (-12.96 Da),<br>2 <sup>nd</sup>            | Unknown | -                                                                              | 807.43 | -14.56 | 31.17 | 3.90 | 0.091   | 0.009  | -                                |
| A058 | Unknown (-12.96 Da)                                | Unknown | -                                                                              | 807.97 | -12.96 | 31.17 | 3.90 | 0.015   | 0.001  | -                                |
| A059 | Unknown (-10.07 Da)                                | Unknown | -                                                                              | 809.46 | -8.48  | -     | 5.00 | 2.883   | 0.282  | -                                |
| A060 | Unknown (8.85 Da)                                  | Unknown | -                                                                              | 815.24 | 8.87   | 36.82 | 5.67 | 0.004   | 0.000  | -                                |
| A061 | Unknown (34.92 Da)                                 | Unknown | -                                                                              | 823.93 | 34.92  | 27.17 | 4.10 | 0.007   | 0.001  | -                                |

|      |                                               |         |   |        |        |       |      |       |       |   |
|------|-----------------------------------------------|---------|---|--------|--------|-------|------|-------|-------|---|
| A062 | Unknown (53.11 Da)                            | Unknown | - | 829.93 | 52.93  | 28.60 | 5.09 | 3.665 | 0.359 | - |
| A063 | Unknown<br>(likely S-addition of an aldehyde) | Unknown | - | 830.97 | 56.05  | 27.30 | 5.25 | 0.862 | 0.084 | - |
| A064 | Unknown (62.01 Da)                            | Unknown | - | 832.96 | 62.01  | 26.32 | 3.60 | 0.005 | 0.001 | - |
| A065 | Unknown (101.06 Da)                           | Unknown | - | 845.99 | 101.12 | 26.05 | 3.60 | 0.069 | 0.007 | - |
| A066 | Unknown (109.03 Da)                           | Unknown | - | 848.63 | 109.03 | 27.30 | 5.11 | 0.012 | 0.001 | - |
| A067 | Unknown (111.03 Da)                           | Unknown | - | 849.28 | 110.98 | 38.20 | 6.26 | 0.005 | 0.000 | - |
| A068 | Unknown (126.08 Da)                           | Unknown | - | 854.31 | 126.07 | 27.70 | 4.90 | 0.005 | 0.000 | - |
| A069 | Unknown (137.06 Da)                           | Unknown | - | 858.00 | 137.14 | 27.40 | 4.20 | 0.271 | 0.027 | - |
| A070 | Unknown (138.06 Da)                           | Unknown | - | 858.34 | 138.15 | 26.39 | 4.20 | 0.160 | 0.016 | - |
| A071 | Unknown (143 Da)                              | Unknown | - | 859.94 | 142.96 | 25.50 | 2.56 | 0.512 | 0.050 | - |
| A072 | Unknown (151.99 Da)                           | Unknown | - | 862.95 | 151.99 | 26.08 | 3.20 | 1.013 | 0.099 | - |
| A073 | Unknown (+154.35 Da), 2 <sup>nd</sup>         | Unknown | - | 863.20 | 152.75 | 31.83 | 5.20 | 0.009 | 0.001 | - |
| A074 | Unknown (153.05 Da)                           | Unknown | - | 863.30 | 153.05 | 25.97 | 3.24 | 0.631 | 0.062 | - |
| A075 | Unknown (+155.07 Da), 2 <sup>nd</sup>         | Unknown | - | 863.44 | 153.47 | 32.47 | 3.80 | 1.661 | 0.163 | - |
| A076 | Unknown (+154.35 Da)                          | Unknown | - | 863.74 | 154.35 | 31.83 | 5.20 | 0.008 | 0.001 | - |
| A077 | Unknown (+155.07 Da)                          | Unknown | - | 863.98 | 155.07 | 32.47 | 3.80 | 2.588 | 0.253 | - |
| A078 | Unknown (156.09 Da)                           | Unknown | - | 864.32 | 156.10 | 34.76 | 5.50 | 0.004 | 0.000 | - |
| A079 | Unknown (156.96 Da)                           | Unknown | - | 864.61 | 156.97 | 26.20 | 3.62 | 1.321 | 0.129 | - |
| A080 | Unknown (180.02 Da)                           | Unknown | - | 872.26 | 179.93 | -     | 3.35 | 1.645 | 0.161 | - |
| A081 | Unknown (183.02 Da)                           | Unknown | - | 873.29 | 183.02 | 26.70 | 3.39 | 0.083 | 0.008 | - |
| A082 | Unknown (185.02 Da)                           | Unknown | - | 873.96 | 185.02 | 27.22 | 4.95 | 0.010 | 0.001 | - |
| A083 | Unknown (192 Da)                              | Unknown | - | 875.95 | 190.99 | 27.70 | 3.40 | 0.836 | 0.082 | - |
| A084 | Unknown (202.02 Da)                           | Unknown | - | 879.63 | 202.02 | -     | 4.95 | 0.002 | 0.000 | - |
| A085 | Unknown (212.32 Da)                           | Unknown | - | 883.06 | 212.32 | -     | 4.95 | 0.010 | 0.001 | - |
| A086 | Unknown (247.1 Da)                            | Unknown | - | 894.66 | 247.12 | 26.10 | 3.70 | 0.564 | 0.055 | - |
| A087 | Unknown (262.1 Da)                            | Unknown | - | 899.64 | 262.06 | 29.30 | 3.92 | 0.013 | 0.001 | - |
| A088 | Unknown (319.09 Da)                           | Unknown | - | 918.65 | 319.09 | 29.20 | 3.14 | 3.038 | 0.297 | - |
| A089 | Unknown (+320.97 Da), 2 <sup>nd</sup>         | Unknown | - | 918.74 | 319.37 | 30.96 | 3.14 | 2.961 | 0.290 | - |

|      |                                       |         |   |        |        |       |      |       |       |   |
|------|---------------------------------------|---------|---|--------|--------|-------|------|-------|-------|---|
| A090 | Unknown (+322.08 Da), 2 <sup>nd</sup> | Unknown | - | 919.11 | 320.48 | 30.52 | 3.70 | 0.013 | 0.001 | - |
| A091 | Unknown (+320.97 Da)                  | Unknown | - | 919.28 | 320.97 | 30.52 | 3.70 | 0.007 | 0.001 | - |
| A092 | Unknown (322.08 Da)                   | Unknown | - | 919.65 | 322.08 | 30.52 | 3.70 | 0.006 | 0.001 | - |
| A093 | Unknown (+340.08 Da), 2 <sup>nd</sup> | Unknown | - | 925.11 | 338.48 | 30.63 | 3.78 | 0.004 | 0.000 | - |
| A094 | Unknown (+340.08 Da)                  | Unknown | - | 925.65 | 340.08 | 30.63 | 3.78 | 0.004 | 0.000 | - |
| A095 | Unknown (346.14 Da)                   | Unknown | - | 927.67 | 346.15 | 27.10 | 2.90 | 0.091 | 0.009 | - |
| A096 | Unknown (351.07 Da)                   | Unknown | - | 929.31 | 351.07 | 32.20 | 5.20 | 0.037 | 0.004 | - |
| A097 | Unknown (360.19 Da)                   | Unknown | - | 932.35 | 360.19 | 25.37 | 3.05 | 0.284 | 0.028 | - |
| A098 | Unknown (388.2 Da)                    | Unknown | - | 941.69 | 388.21 | 25.30 | 3.02 | 0.194 | 0.019 | - |
| A099 | Unknown (461.2 Da)                    | Unknown | - | 966.02 | 461.20 | 25.40 | 3.05 | 1.263 | 0.124 | - |
| A100 | Unknown (+476 Da)                     | Unknown | - | 970.69 | 475.21 | 28.10 | 3.13 | 0.048 | 0.005 | - |
| A101 | Unknown (+489 Da)                     | Unknown | - | 975.04 | 488.25 | 25.33 | 2.98 | 0.349 | 0.034 | - |
| A102 | Unknown (+495.21 Da, M49, OS39)       | Unknown | - | 977.35 | 495.19 | 26.96 | 3.52 | 0.941 | 0.092 | - |
| A103 | Unknown (+509.21 Da)                  | Unknown | - | 982.03 | 509.23 | 25.30 | 2.95 | 0.016 | 0.002 | - |
| A104 | Unknown (+545.22 Da), 2 <sup>nd</sup> | Unknown | - | 993.49 | 543.62 | 27.63 | 2.50 | 0.440 | 0.043 | - |
| A105 | Unknown (+545.22 Da)                  | Unknown | - | 994.03 | 545.22 | 27.63 | 2.50 | 0.475 | 0.047 | - |

<sup>a</sup> Peak-Area Ratio = Adduct peak area / Housekeeping peptide peak area. <sup>b</sup> Estimated adduct concentrations.
