# Supplementary material for: Cord Blood Adductomics Reveals Oxidative Stress Exposure Pathways of Bronchopulmonary Dysplasia
Source: MDPI journal article supplement (doi:10.3390/antiox13040494), 2024-04-20
Supplement: s1 [file s1]

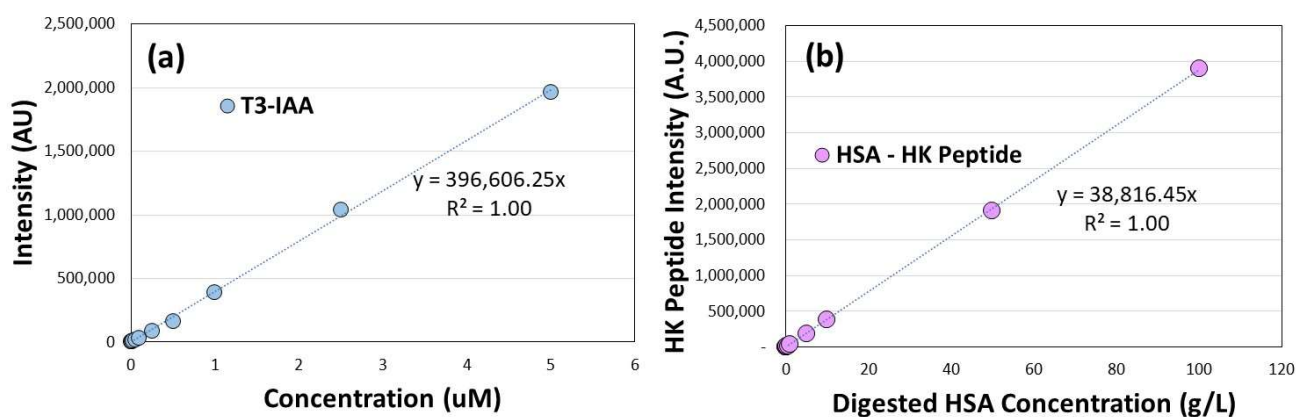

**Figure S1. Calibration curves used to estimate adduct concentrations in pmol/mg.** Two calibration curves were used to convert adduct concentrations from PAR to pmol/mg. (a) Synthetic T3 peptide was modified with IAA and was used to determine adduct peak area at peptide concentrations ranging from 0.01 to 5 uM. (b) Digested HSA was used to determine HKP peak area at concentrations ranging from 0 to 100 g/L.
