# Supplementary material for: Cord Blood Adductomics Reveals Oxidative Stress Exposure Pathways of Bronchopulmonary Dysplasia
Source: MDPI journal article supplement (doi:10.3390/antiox13040494), 2024-04-20
Supplement: s1 [file s1]

**Table S2. Median concentrations according to health condition and collection timepoint.**

| Adduct # | Cord Blood                 |                            |                            | Peripheral Blood            |                             |                            |                            |                             |                             |
|----------|----------------------------|----------------------------|----------------------------|-----------------------------|-----------------------------|----------------------------|----------------------------|-----------------------------|-----------------------------|
|          | Full-Term                  | No BPD                     | BPD                        | No BPD                      |                             |                            | BPD                        |                             |                             |
|          |                            |                            |                            | 1-week                      | 1-month                     | 36-weeks                   | 1-week                     | 1-month                     | 36-weeks                    |
| A001     | 0.09<br>[0.02-0.26]        | 0.34<br>[0.1-0.8]          | 0.38<br>[0.12-1.01]        | 0.25<br>[0.06, 0.75]        | 0.05<br>[0.04, 0.12]        | 0.1<br>[0.03, 0.24]        | 0.12<br>[0.04, 0.41]       | 0.16<br>[0.06, 0.36]        | 0.14<br>[0.03, 0.42]        |
| A002     | 0.76<br>[0.41-1.19]        | 0.64<br>[0.21-1.04]        | 0.45<br>[0.26-0.96]        | 1.15<br>[0.42, 1.96]        | 0.74<br>[0.42, 1.96]        | 0.86<br>[0.45, 1.94]       | 0.77<br>[0.23, 1.21]       | 1.57<br>[0.46, 2.12]        | 0.31<br>[0.16, 1.38]        |
| A003     | 0.02<br>[0-0.06]           | 0.03<br>[0.01-0.12]        | 0.02<br>[0.01-0.1]         | 0.03<br>[0.02, 0.14]        | 0.03<br>[0.02, 0.3]         | 0.04<br>[0.01, 0.11]       | 0.04<br>[0.01, 0.14]       | 0.03<br>[0.01, 0.2]         | 0.08<br>[0.02, 0.33]        |
| A004     | 0.21<br>[0.1-0.4]          | 0.14<br>[0.05-0.33]        | 0.14<br>[0.04-0.46]        | 0.96<br>[0.22, 4.34]        | 0.53<br>[0.21, 69.91]       | 0.33<br>[0.17, 0.67]       | 0.62<br>[0.15, 1.3]        | 0.36<br>[0.13, 0.68]        | 1.06<br>[0.08, 231.29]      |
| A005     | 674.54<br>[416.09-948.26]  | 709.68<br>[425.35-1010.34] | 777.2<br>[511.17-1019.32]  | 1070.6 [659.35,<br>1508.62] | 731.54 [463.08,<br>1169.27] | 312.6 [20.26,<br>1064.32]  | 763.07 [378.73,<br>945.27] | 562.43 [206.24,<br>1218.92] | 503.27 [255.71,<br>1162.24] |
| A006     | 704.42<br>[481.41-1068.38] | 822.28<br>[474.3-1047.25]  | 781.68<br>[537.59-1072.16] | 1182.25 [568.15,<br>1481.2] | 682.14 [445.94,<br>1130.06] | 699.34 [355.34,<br>1032.5] | 729.6 [385.17,<br>1138.08] | 584.71 [308.45,<br>1114.39] | 475.04 [275.05,<br>1127.61] |
| A007     | 1.59<br>[0.81-2.68]        | 2.06<br>[0.87-3]           | 1.78<br>[1.14-3.05]        | 2.38 [1.61, 5.88]           | 1.81 [0.75, 4.74]           | 2.34 [1.63, 4.12]          | 1.66 [0.69, 3.22]          | 1.78 [0.49, 3.48]           | 1.12 [0.65, 1.69]           |
| A008     | 28.71<br>[19-50.67]        | 33.89<br>[18.04-50.18]     | 37.61 [21.94-60.06]        | 111.36 [53.45,<br>151.01]   | 37.82 [26.44,<br>87.26]     | 45.12 [21, 71.84]          | 45.37 [26.3,<br>104.18]    | 37.12 [17.71,<br>86.41]     | 25.41 [12.65,<br>64.71]     |
| A009     | 26.32<br>[13.31-37.89]     | 29.95<br>[15.51-42.6]      | 33.77 [17.71-50.13]        | 76.24 [38.84,<br>121.65]    | 30.68 [21.42,<br>68.47]     | 28.38 [13.43,<br>69.3]     | 37.94 [23.92,<br>65.56]    | 21.09 [14.35,<br>79.22]     | 22.04 [9.84,<br>44.03]      |
| A010     | 32.74<br>[16.72-51.99]     | 32.75<br>[17.39-53.38]     | 35.04 [20.33-57.64]        | 161.11 [71.97,<br>283.28]   | 114.84 [46, 196.76]         | 48.54 [25.94,<br>143.49]   | 86.24 [38.11,<br>149.18]   | 62.06 [29.48,<br>146.9]     | 74.64 [14.06,<br>173.95]    |
| A011     | 2.37<br>[1.34-4.03]        | 2.44<br>[1.31-4.04]        | 2.57<br>[1.37-4.49]        | 3.59 [2.07, 8.57]           | 3.85 [2.1, 6.79]            | 2.17 [1.03, 7.02]          | 2.78 [1.44, 5.2]           | 3.14 [1.51, 7.14]           | 2.71 [0.79, 5.37]           |
| A012     | 0.04<br>[0.01-0.14]        | 0.03<br>[0-0.12]           | 0.05<br>[0-0.17]           | 0.06 [0.02, 0.37]           | 0.16 [0.02, 0.45]           | 0.06 [0.04, 0.12]          | 0.03 [0.01, 0.35]          | 0.11 [0.03, 0.25]           | 0.05 [0.02, 0.33]           |
| A013     | 1.87<br>[1.29-3.26]        | 2.1<br>[0.98-3.7]          | 1.95<br>[1.11-3.59]        | 3.25 [0.68, 6.14]           | 4.2 [1.57, 8.23]            | 3.18 [2.48, 7.25]          | 2.96 [1.38, 6.12]          | 2.34 [1.24, 7.07]           | 2.16 [1.15, 7.39]           |
| A014     | 1.6<br>[0.91-2.73]         | 1.55<br>[0.88-2.58]        | 1.71<br>[0.9-2.57]         | 2.81 [1.13, 7.78]           | 2.28 [1.14, 6.57]           | 4.1 [1.64, 5.42]           | 2.16 [1.25, 5.37]          | 2.05 [0.84, 5.66]           | 1.7 [0.69, 7.69]            |
| A015     | 1.42<br>[0.66-2.35]        | 1.14<br>[0.61-2.74]        | 1.42<br>[0.83-2.96]        | 7.71 [4.28, 15.91]          | 6.24 [2.19, 8.9]            | 1.51 [0.18, 3.04]          | 3.74 [1.13, 6.31]          | 3.35 [1.14, 7.54]           | 5.17 [0.48, 13.36]          |
| A016     | 0.29<br>[0.16-0.56]        | 0.3<br>[0.14-0.6]          | 0.37<br>[0.19-0.59]        | 1.88 [0.5, 3.8]             | 1.33 [0.83, 2.52]           | 1.23 [0.46, 1.9]           | 1.04 [0.49, 1.56]          | 1.57 [0.17, 2.72]           | 1.05 [0.42, 1.75]           |
| A017     | 0.35<br>[0.2-0.89]         | 0.39<br>[0.16-0.85]        | 0.4<br>[0.17-0.83]         | 1.15 [0.53, 2.7]            | 1.45 [0.74, 2.55]           | 1.21 [0.39, 2.58]          | 0.87 [0.48, 2.19]          | 1.19 [0.49, 2.08]           | 0.65 [0.4, 2.03]            |
| A018     | 0.07<br>[0.03-0.3]         | 0.06<br>[0.02-0.15]        | 0.11<br>[0.04-0.23]        | 0.15 [0.02, 0.64]           | 0.4 [0.2, 0.69]             | 0.14 [0.08, 0.51]          | 0.19 [0.04, 0.59]          | 0.35 [0.1, 0.61]            | 0.31 [0.11, 0.64]           |
| A019     | 1.48<br>[0.53-2.57]        | 0.55<br>[0.25-0.97]        | 0.59<br>[0.29-1.06]        | 1.77 [0.9, 3.38]            | 3 [1.85, 5.3]               | 1.97 [1.4, 4.02]           | 2.67 [1.33, 3.21]          | 3.7 [1.67, 5.92]            | 1.31 [0.81, 5.09]           |
| A020     | 2.49<br>[1.31-4.58]        | 1.24<br>[0.34-2.24]        | 0.85<br>[0.35-1.72]        | 3.17 [1.04, 5.89]           | 6.28 [2.81, 8.35]           | 4.75 [3.39, 6.14]          | 2.61 [1.49, 4.27]          | 4.38 [1.7, 11.68]           | 2.85 [0.78, 6.15]           |
| A021     | 0.1<br>[0.04-0.39]         | 0.06<br>[0.02-0.17]        | 0.12<br>[0.04-0.29]        | 0.15 [0.02, 0.64]           | 0.4 [0.2, 0.69]             | 0.14 [0.08, 0.51]          | 0.19 [0.04, 0.59]          | 0.35 [0.1, 0.61]            | 0.31 [0.11, 0.64]           |
| A022     | 2.43<br>[1.01-4.67]        | 0.79<br>[0.36-2.02]        | 0.98<br>[0.37-2.05]        | 2.86 [0.78, 4.06]           | 3.77 [2.33, 9]              | 2.97 [1.97, 4.27]          | 2.57 [0.89, 3.33]          | 3.53 [1.7, 5.58]            | 2.73 [0.99, 6.19]           |
| A023     | 4.84<br>[2.08-8.91]        | 5.66<br>[2.38-10.63]       | 5.58<br>[2.88-10.1]        | 16.22 [6.47, 24.7]          | 8.38 [6.45, 13.34]          | 8.14 [3.17, 13.91]         | 4.5 [2.6, 12.02]           | 5.28 [2.95, 11.1]           | 5.86 [2.13, 14.1]           |
| A024     | 0.44<br>[0.25-0.78]        | 0.4<br>[0.15-0.78]         | 0.37<br>[0.24-0.65]        | 1.63 [0.31, 3.23]           | 1.16 [0.8, 2.22]            | 0.66 [0.49, 0.94]          | 0.93 [0.36, 1.95]          | 0.97 [0.28, 2.54]           | 0.7 [0.23, 1.87]            |

|      |                           |                           |                          |                          |                            |                           |                         |                           |                          |
|------|---------------------------|---------------------------|--------------------------|--------------------------|----------------------------|---------------------------|-------------------------|---------------------------|--------------------------|
| A025 | 0.27<br>[0.13-0.48]       | 0.22<br>[0.12-0.44]       | 0.29<br>[0.12-0.61]      | 1.06 [0.23, 2.46]        | 0.46 [0.23, 1.04]          | 0.79 [0.44, 1.47]         | 0.41 [0.19, 1.49]       | 0.69 [0.23, 1.62]         | 0.42 [0.19, 0.82]        |
| A026 | 2.3<br>[1.02-3.27]        | 2.41<br>[1.15-3.67]       | 2.34<br>[1.45-4.09]      | 9.8 [2.55, 13.11]        | 4.98 [2.88, 7.91]          | 2.96 [1.1, 6.93]          | 4.9 [1.62, 10.43]       | 2.99 [1.4, 6.79]          | 3.27 [0.94, 5.7]         |
| A027 | 0.12<br>[0.05-0.21]       | 0.11<br>[0.05-0.23]       | 0.16<br>[0.06-0.26]      | 0.39 [0.18, 0.74]        | 0.44 [0.14, 0.68]          | 0.18 [0.09, 0.88]         | 0.46 [0.27, 1.49]       | 0.3 [0.14, 0.67]          | 0.52 [0.06, 1.45]        |
| A028 | 0.72<br>[0.39-1.13]       | 1.11<br>[0.42-1.72]       | 1.15 [0.47-1.64]         | 3.26 [1.75, 7.55]        | 2.89 [1.91, 4.91]          | 2.21 [0.44, 4.55]         | 1.64 [0.76, 4.29]       | 2.18 [0.41, 4.38]         | 1.1 [0.21, 2.09]         |
| A029 | 0.11<br>[0.06-0.24]       | 0.11<br>[0.04-0.28]       | 0.11<br>[0.05-0.2]       | 0.79 [0.51, 1.37]        | 0.28 [0.13, 0.88]          | 0.49 [0.12, 0.95]         | 0.58 [0.18, 0.76]       | 0.3 [0.1, 0.72]           | 0.11 [0.04, 0.86]        |
| A030 | 0.15<br>[0.06-0.31]       | 0.16<br>[0.07-0.41]       | 0.15<br>[0.07-0.29]      | 0.43 [0.14, 1.16]        | 0.68 [0.27, 1.25]          | 0.38 [0.21, 0.52]         | 0.51 [0.19, 1.3]        | 0.52 [0.22, 1.52]         | 0.31 [0.24, 0.95]        |
| A031 | 0.75<br>[0.32-1.32]       | 0.5<br>[0.22-1.04]        | 0.54<br>[0.28-0.98]      | 6.06 [2.13, 7.72]        | 5.36 [2.58, 8.1]           | 3.05 [1.24, 3.63]         | 5.21 [1.91, 7.03]       | 3.85 [0.67, 7.49]         | 1.05 [0.47, 4.94]        |
| A032 | 1.21<br>[0.6-2.24]        | 0.97<br>[0.4-1.92]        | 0.98<br>[0.47-1.93]      | 8.87 [3.22, 18.17]       | 6.45 [4, 12.96]            | 4 [2.34, 7.31]            | 7.18 [4.3, 15.21]       | 4.77 [1.81, 12.37]        | 2.26 [1.54, 7.92]        |
| A033 | 1.07<br>[0.62-2.14]       | 1.16<br>[0.46-1.95]       | 1.11<br>[0.55-2.03]      | 8.01 [4.07, 19.8]        | 7.29 [3.43, 15.41]         | 3.5 [1.88, 8.39]          | 7.09 [3.13, 15.63]      | 7.01 [1.89, 14.05]        | 2.11 [0.87, 10.79]       |
| A034 | 2.65<br>[1.24-6.43]       | 2.46<br>[1.29-5.3]        | 2.28<br>[1.23-4.64]      | 4.77 [1.48, 22.37]       | 9.37 [6.1, 20.58]          | 8.12 [4.52, 10.62]        | 6.16 [2.75, 11.07]      | 6.12 [2.86, 12.56]        | 3.67 [1.67, 16.87]       |
| A035 | 0<br>[0-0]                | 0<br>[0-0.01]             | 0<br>[0-0.01]            | 0.02 [0.01, 0.03]        | 0.01 [0.01, 0.04]          | 0.01 [0, 0.01]            | 0.02 [0.01, 0.03]       | 0.01 [0.01, 0.04]         | 0.01 [0, 0.02]           |
| A036 | 0.15<br>[0.05-0.4]        | 0.16<br>[0.06-0.49]       | 0.13<br>[0.04-0.34]      | 0.61 [0.23, 2.58]        | 0.45 [0.14, 0.72]          | 0.39 [0.13, 0.55]         | 0.51 [0.21, 1.5]        | 0.9 [0.14, 1.7]           | 0.26 [0.1, 0.48]         |
| A037 | 0<br>[0-0.02]             | 0<br>[0-0.02]             | 0<br>[0-0.01]            | 0.01 [0.01, 0.03]        | 0.01 [0, 0.02]             | 0.01 [0, 0.02]            | 0.02 [0.01, 0.1]        | 0.02 [0.01, 0.08]         | 0.01 [0, 0.05]           |
| A038 | 0.09<br>[0.04-0.31]       | 0.17<br>[0.05-0.41]       | 0.15<br>[0.05-0.4]       | 1.08 [0.77, 3.43]        | 2.71 [1.48, 6.86]          | 2.01 [0.97, 2.92]         | 1.05 [0.42, 2.99]       | 2.56 [0.87, 9.58]         | 1.75 [0.33, 5.51]        |
| A039 | 0.01<br>[0-0.05]          | 0.01<br>[0-0.03]          | 0.01<br>[0-0.06]         | 0.02 [0.02, 0.04]        | 0.13 [0.02, 0.28]          | 0.03 [0.02, 0.17]         | 0.03 [0.01, 0.11]       | 0.09 [0.02, 0.2]          | 0.02 [0.01, 0.13]        |
| A040 | 374.84<br>[265.25-623.91] | 322.86<br>[204.06-659.41] | 394.7<br>[285.2-577.26]  | 1050.7 [604.08, 1963.57] | 1541.41 [1107.58, 2075.36] | 1279.46 [704.46, 1535.36] | 1036.37 [592.3, 1478.9] | 1213.83 [548.78, 1876.52] | 782.47 [442.28, 1993.06] |
| A041 | 108.54<br>[68.29-187.48]  | 88.34<br>[57-209.67]      | 109.35<br>[78.29-172.26] | 400.73 [172.84, 903.15]  | 574.74 [376.78, 883.04]    | 513.07 [242.76, 636.02]   | 385.57 [179.17, 604.52] | 448.33 [196.92, 749.56]   | 268.42 [147.39, 927.67]  |
| A042 | 0.01<br>[0-0.05]          | 0.03<br>[0.01-0.07]       | 0.03<br>[0.01-0.07]      | 0.03 [0.02, 0.04]        | 0.01 [0.01, 0.02]          | 0.02 [0.02, 0.05]         | 0.05 [0.02, 0.23]       | 0.02 [0.01, 0.04]         | 0.01 [0, 0.05]           |
| A043 | 0.32<br>[0.19-0.7]        | 0.4<br>[0.14-0.79]        | 0.37<br>[0.18-0.67]      | 1.57 [0.35, 2.94]        | 2.16 [1.09, 2.73]          | 1.28 [0.45, 2.19]         | 0.94 [0.55, 1.59]       | 0.58 [0.43, 1.71]         | 0.66 [0.32, 2.92]        |
| A044 | 28.89<br>[16.66-46.52]    | 22.54<br>[12.46-49.44]    | 28.67 [15.67-48.7]       | 127.4 [23.16, 263.19]    | 116.23 [62.44, 179.29]     | 76 [63.22, 219.63]        | 139.39 [32.5, 242.27]   | 85.65 [27.81, 166.76]     | 55.27 [21.54, 175.22]    |
| A045 | 30<br>[19.08-54.37]       | 24.28<br>[12.41-57.22]    | 32.74 [15.99-53.9]       | 130.41 [51.86, 499.7]    | 172.89 [104.83, 341.75]    | 125.87 [52.51, 204.86]    | 90.75 [43.8, 193.75]    | 132.17 [43.65, 230.96]    | 68.95 [31.5, 256]        |
| A046 | 2.38<br>[1.25-4.13]       | 1.52<br>[0.75-3.18]       | 2<br>[1.02-2.74]         | 9.13 [1.36, 20.14]       | 3.83 [1.73, 6.57]          | 3.28 [1.17, 5.18]         | 5.09 [2.05, 10.2]       | 2.56 [0.61, 6.22]         | 1.05 [0.65, 7.5]         |
| A047 | 26.12<br>[17.75-49.17]    | 25.27<br>[12.65-50.53]    | 29.05 [18.16-45.77]      | 81.45 [25.16, 266.93]    | 87.68 [14.28, 182.32]      | 86.18 [47.96, 148.3]      | 55.54 [33.37, 95.93]    | 68.25 [45.4, 164.87]      | 25.7 [9.01, 62.04]       |
| A048 | 0.91<br>[0.48-1.68]       | 0.92<br>[0.36-1.6]        | 1.13<br>[0.59-1.67]      | 11.7 [2.92, 32.41]       | 9.52 [3.64, 35.52]         | 6.19 [1.79, 11.27]        | 8.64 [2.81, 21.12]      | 14.44 [3.52, 37.62]       | 2.82 [0.67, 6.51]        |
| A049 | 2.45<br>[1.64-5.01]       | 2.92<br>[1.27-4.88]       | 2.48<br>[1.55-4.27]      | 8.24 [3.15, 36.82]       | 11.36 [7.53, 25.66]        | 11.35 [6.51, 16.31]       | 9.36 [4, 24.28]         | 5.29 [3.3, 20.79]         | 7.99 [3.8, 26.41]        |
| A050 | 0.43<br>[0.2-1.11]        | 0.62<br>[0.26-1.21]       | 0.82<br>[0.35-1.36]      | 3.89 [1.09, 15.08]       | 4.4 [1.26, 9.46]           | 2.13 [1.01, 4.37]         | 3.77 [1.6, 5.34]        | 3.11 [1.52, 9.24]         | 0.7 [0.4, 3.86]          |
| A051 | 54.18<br>[26.07-99.14]    | 46.77<br>[21.95-90.73]    | 42.29 [25.09-75.25]      | 284.26 [78.48, 984.52]   | 390.29 [38.25, 621.4]      | 289.93 [102.47, 373.1]    | 223.16 [50.94, 516.77]  | 158.01 [54.89, 473.47]    | 61.27 [19.8, 240.63]     |
| A052 | 1.85<br>[0.84-3.81]       | 1.41<br>[0.72-2.99]       | 1.56<br>[0.74-3.64]      | 22.41 [6.5, 81.09]       | 14.29 [5.23, 44.34]        | 14.8 [3.84, 25.73]        | 17.42 [4.63, 27.86]     | 6.82 [1.95, 23.66]        | 8.29 [2.65, 25.62]       |
|      |                           |                           |                          |                          |                            |                           |                         |                           |                          |

|      |                     |                     |                      |                     |                     |                     |                     |                     |                    |
|------|---------------------|---------------------|----------------------|---------------------|---------------------|---------------------|---------------------|---------------------|--------------------|
| A053 | 1.63<br>[0.9-3.32]  | 1.45<br>[0.71-2.45] | 1.16<br>[0.74-2.8]   | 12.57 [6.54, 63.96] | 15.15 [8.44, 28.29] | 7.44 [3.78, 11.88]  | 10.81 [3.14, 36.81] | 7.48 [2.05, 23.96]  | 9.45 [3.46, 28.38] |
| A054 | 0.19<br>[0.08-0.38] | 0.17<br>[0.08-0.28] | 0.17<br>[0.07-0.3]   | 0.74 [0.35, 6.17]   | 1.43 [0.38, 4.36]   | 0.76 [0.35, 1.41]   | 0.8 [0.28, 3.32]    | 0.57 [0.18, 1.63]   | 0.5 [0.23, 2.36]   |
| A055 | 0.47<br>[0.28-1.17] | 0.59<br>[0.21-1.42] | 0.69<br>[0.25-1.36]  | 4.55 [1.75, 21.76]  | 4.29 [2.3, 10.04]   | 3.79 [1.55, 9.95]   | 6.52 [1.14, 13.35]  | 2.06 [0.72, 6.04]   | 1.66 [0.66, 8.49]  |
| A056 | 0.71<br>[0.41-1.58] | 0.68<br>[0.39-1.47] | 0.81<br>[0.45-1.55]  | 3.17 [0.37, 15.57]  | 4.34 [0.57, 7.55]   | 4.83 [1.9, 8.73]    | 3.38 [1.21, 8.17]   | 3.11 [1.47, 7.5]    | 0.83 [0.16, 4.15]  |
| A057 | 0.13<br>[0.05-0.3]  | 0.23<br>[0.08-0.6]  | 0.27<br>[0.11-0.54]  | 0.1 [0.03, 0.7]     | 0.23 [0.02, 0.32]   | 0.19 [0.03, 0.65]   | 0.25 [0.07, 0.77]   | 0.18 [0.08, 0.47]   | 0.13 [0.02, 0.31]  |
| A058 | 0.03<br>[0.01-0.09] | 0.03<br>[0.01-0.08] | 0.03<br>[0.01-0.08]  | 0.04 [0.02, 0.16]   | 0.03 [0.01, 0.07]   | 0.03 [0.01, 0.05]   | 0.06 [0.03, 0.15]   | 0.04 [0.02, 0.12]   | 0.03 [0.01, 0.09]  |
| A059 | 8.42<br>[4.4-14.88] | 4.79<br>[1.16-8.29] | 3.51<br>[1.61-6.26]  | 2.15 [1.06, 4.69]   | 10.31 [6.51, 18.82] | 8.38 [5.6, 14.76]   | 3.9 [1.96, 9.16]    | 10.31 [5.34, 18.21] | 4.24 [1.42, 9.83]  |
| A060 | 0.01<br>[0-0.06]    | 0.01<br>[0-0.05]    | 0.01<br>[0-0.06]     | 0.02 [0.01, 0.19]   | 0.01 [0, 0.04]      | 0.2 [0.01, 474]     | 0.08 [0.01, 0.53]   | 0.02 [0.01, 0.05]   | 0.02 [0.01, 0.09]  |
| A061 | 0.01<br>[0-0.04]    | 0.01<br>[0-0.04]    | 0.01<br>[0.01-0.02]  | 0.05 [0.02, 0.37]   | 0.05 [0.02, 0.11]   | 0.05 [0.02, 0.15]   | 0.03 [0.01, 0.06]   | 0.03 [0.02, 0.05]   | 0.03 [0.01, 0.08]  |
| A062 | 5.17<br>[3.09-7.69] | 6.82<br>[2.89-9.31] | 6.13<br>[3.87-10.25] | 16.73 [4.64, 24.44] | 9.87 [5.28, 12.28]  | 3.99 [1.26, 8.17]   | 6.45 [2.64, 16.94]  | 6.99 [2.8, 12.79]   | 4.14 [2.16, 13.36] |
| A063 | 1.44<br>[0.8-2.35]  | 1.42<br>[0.61-2.61] | 1.83<br>[0.85-2.64]  | 3.66 [0.8, 4.12]    | 1.46 [0.64, 2.24]   | 2.63 [1.28, 4.2]    | 1.95 [0.87, 4.75]   | 1.6 [0.45, 2.4]     | 0.67 [0.43, 2.02]  |
| A064 | 0.01<br>[0-0.04]    | 0.01<br>[0-0.02]    | 0.01<br>[0-0.03]     | 0.02 [0.02, 0.05]   | 0.02 [0.01, 0.02]   | 0.02 [0.01, 0.47]   | 0.04 [0.02, 0.27]   | 0.03 [0.02, 0.16]   | 0.04 [0.01, 0.06]  |
| A065 | 0.13<br>[0.06-0.41] | 0.05<br>[0.02-0.21] | 0.07<br>[0.01-0.15]  | 0.66 [0.16, 2.99]   | 0.62 [0.36, 2.1]    | 0.88 [0.38, 1.23]   | 0.87 [0.17, 2.36]   | 0.5 [0.22, 1.49]    | 0.45 [0.12, 1.68]  |
| A066 | 0.02<br>[0-0.07]    | 0.02<br>[0-0.1]     | 0.03<br>[0-0.1]      | 0.44 [0.03, 0.57]   | 0.17 [0.08, 0.55]   | 0.16 [0.08, 0.32]   | 0.07 [0.03, 0.34]   | 0.19 [0.05, 0.43]   | 0.24 [0.03, 0.36]  |
| A067 | 0<br>[0-0.01]       | 0.01<br>[0-0.05]    | 0.01<br>[0-0.04]     | 0.03 [0.01, 0.15]   | 0.01 [0.01, 0.03]   | 0.02 [0.01, 0.04]   | 0.01 [0.01, 0.06]   | 0.04 [0.01, 0.12]   | 0.01 [0, 0.04]     |
| A068 | 0.01<br>[0-0.02]    | 0.02<br>[0-0.05]    | 0.01<br>[0-0.03]     | 0.12 [0.02, 0.51]   | 0.13 [0.03, 0.37]   | 0.02 [0.01, 0.16]   | 0.06 [0.01, 0.16]   | 0.11 [0.02, 0.35]   | 0.07 [0.01, 0.41]  |
| A069 | 0.69<br>[0.37-1.3]  | 0.39<br>[0.13-0.89] | 0.35<br>[0.14-0.74]  | 3.18 [0.51, 6.92]   | 0.47 [0.08, 1.3]    | 0.19 [0.06, 0.42]   | 1.55 [0.29, 2.98]   | 0.42 [0.11, 1.32]   | 0.22 [0.03, 0.75]  |
| A070 | 0.35<br>[0.13-0.75] | 0.2<br>[0.05-0.58]  | 0.17<br>[0.07-0.42]  | 2.15 [0.23, 3.18]   | 0.58 [0.28, 0.97]   | 0.26 [0.1, 0.68]    | 1.12 [0.32, 1.81]   | 0.33 [0.15, 0.8]    | 0.29 [0.09, 0.63]  |
| A071 | 0.4<br>[0.17-0.73]  | 0.73<br>[0.26-1.49] | 0.7<br>[0.36-1.14]   | 2.3 [0.67, 5.11]    | 2.31 [1.08, 3.84]   | 0.68 [0.41, 1.3]    | 3.09 [1.52, 6.3]    | 1.68 [0.69, 3.46]   | 0.75 [0.3, 1.5]    |
| A072 | 1.05<br>[0.73-1.95] | 1.61<br>[0.82-2.96] | 2.16<br>[1-2.99]     | 5 [1.62, 11.65]     | 2.09 [1.41, 4.15]   | 1.15 [0.72, 4.06]   | 3.46 [1.58, 6.7]    | 2.75 [0.86, 5.06]   | 0.76 [0.36, 1.62]  |
| A073 | 0.01<br>[0-0.05]    | 0.01<br>[0-0.04]    | 0.02<br>[0.01-0.06]  | 0.05 [0.01, 0.14]   | 0.02 [0.01, 0.18]   | 0.03 [0.01, 0.08]   | 0.05 [0.02, 0.13]   | 0.03 [0.02, 0.1]    | 0.03 [0.02, 0.12]  |
| A074 | 0.46<br>[0.22-0.81] | 0.96<br>[0.45-1.67] | 1.14<br>[0.45-1.78]  | 4.14 [1.97, 8.08]   | 1.37 [0.48, 2.63]   | 0.53 [0.42, 0.89]   | 2.49 [0.88, 5.44]   | 1.77 [0.61, 3.51]   | 0.42 [0.17, 1.6]   |
| A075 | 2.36<br>[1.16-2.83] | 1.74<br>[1.01-3.74] | 1.8<br>[0.88-3.06]   | 10.67 [2.97, 25.66] | 12.02 [5.85, 28.42] | 8.11 [3.64, 15.22]  | 6.02 [3.07, 10.83]  | 8.35 [1.88, 23.4]   | 6.16 [1.92, 18.47] |
| A076 | 0.01<br>[0-0.06]    | 0.01<br>[0-0.06]    | 0.01<br>[0.01-0.04]  | 0.04 [0.02, 0.22]   | 0.02 [0.01, 0.08]   | 0.06 [0.02, 0.1]    | 0.06 [0.02, 0.41]   | 0.02 [0.01, 0.11]   | 0.04 [0.02, 0.1]   |
| A077 | 3.17<br>[1.72-5.79] | 2.93<br>[1.26-5.73] | 3.03<br>[1.75-5]     | 10.6 [5.54, 38.18]  | 14 [7.09, 34.28]    | 12.57 [4.85, 17.94] | 7.6 [3.44, 17.9]    | 7.63 [3.97, 34.33]  | 6.27 [2.63, 21.35] |
| A078 | 0.01<br>[0-0.03]    | 0.01<br>[0-0.02]    | 0.01<br>[0-0.06]     | 0.02 [0.01, 0.21]   | 0.07 [0.01, 0.23]   | 0.01 [0, 0.03]      | 0.1 [0.02, 0.34]    | 0.02 [0.01, 0.1]    | 0.04 [0.02, 0.25]  |
| A079 | 1.46<br>[0.9-3.04]  | 1.29<br>[0.7-3.52]  | 1.54<br>[0.8-2.67]   | 5.61 [1.39, 13.91]  | 5.61 [2.79, 9.37]   | 4.51 [2.13, 7.17]   | 4.08 [2.32, 8.12]   | 5.1 [1.59, 7.42]    | 2.78 [1.94, 9.23]  |
| A080 | 1.77<br>[0.94-3.65] | 1.53<br>[0.65-3.44] | 1.55 [0.57-2.84]     | 17.8 [6.48, 53.69]  | 15.86 [8.43, 34.68] | 12.64 [4.65, 18.71] | 12.24 [4.48, 45.4]  | 8.98 [2.18, 31.63]  | 8.98 [3.08, 33.07] |
|      |                     |                     |                      |                     |                     |                     |                     |                     |                    |

|             |                     |                      |                      |                     |                      |                    |                      |                      |                      |
|-------------|---------------------|----------------------|----------------------|---------------------|----------------------|--------------------|----------------------|----------------------|----------------------|
| <b>A081</b> | 0.06<br>[0.03-0.17] | 0.09<br>[0.03-0.25]  | 0.1<br>[0.03-0.21]   | 0.65<br>[0.37, 1.9] | 0.54<br>[0.06, 1.29] | 0.41<br>[0.2, 0.8] | 0.52<br>[0.22, 1.71] | 0.69<br>[0.29, 1.22] | 0.18<br>[0.06, 0.36] |
| <b>A082</b> | 0.01<br>[0-0.03]    | 0.02<br>[0.01-0.04]  | 0.02<br>[0.01-0.07]  | 0.06 [0.03, 0.28]   | 0.07 [0.02, 0.16]    | 0.03 [0.01, 0.06]  | 0.07 [0.03, 0.14]    | 0.03 [0.02, 0.08]    | 0.04 [0.01, 0.12]    |
| <b>A083</b> | 0.9<br>[0.45-1.98]  | 0.89<br>[0.3-1.65]   | 0.76<br>[0.43-1.54]  | 9.77 [2.77, 52.77]  | 7.76 [1.49, 23.73]   | 7.76 [3.81, 15.32] | 9.01 [2.02, 19.56]   | 2.84 [1.33, 18.56]   | 1.65 [0.79, 8.8]     |
| <b>A084</b> | 0<br>[0-0.01]       | 0<br>[0-0]           | 0<br>[0-0]           | 0.01 [0.01, 0.02]   | 0.01 [0.01, 0.03]    | 0.01 [0, 0.01]     | 0.02 [0.01, 0.15]    | 0.01 [0, 0.01]       | 0.01 [0, 0.01]       |
| <b>A085</b> | 0.01<br>[0-0.03]    | 0.01<br>[0.01-0.05]  | 0.01<br>[0.01-0.05]  | 0.05 [0.02, 0.28]   | 0.1 [0.02, 0.14]     | 0.05 [0.02, 0.11]  | 0.08 [0.03, 0.19]    | 0.04 [0.03, 0.23]    | 0.02 [0.01, 0.11]    |
| <b>A086</b> | 0.72<br>[0.4-1.19]  | 0.68<br>[0.24-1.21]  | 0.77<br>[0.29-1.37]  | 4.89 [2, 25.17]     | 4.54 [1.97, 7.98]    | 5.3 [1.32, 11.61]  | 3.45 [1.17, 12.05]   | 4.71 [0.77, 7.99]    | 1.5 [0.57, 6.71]     |
| <b>A087</b> | 0.01<br>[0-0.05]    | 0.01<br>[0-0.03]     | 0.01<br>[0-0.05]     | 0.55 [0.25, 2.33]   | 0.53 [0.12, 1.04]    | 0.11 [0.06, 0.17]  | 0.38 [0.18, 0.68]    | 0.38 [0.11, 0.77]    | 0.07 [0.02, 0.5]     |
| <b>A088</b> | 3.61<br>[2.15-6.63] | 7.23<br>[3.59-13.75] | 8.08<br>[4.13-14.61] | 4.75 [2.53, 10.85]  | 2.69 [1.18, 4.75]    | 2.92 [1.67, 12.96] | 5.49 [3.19, 11.4]    | 3.09 [1.9, 4.74]     | 2.88 [1.86, 5.28]    |
| <b>A089</b> | 3.28<br>[2.06-6.03] | 5.82<br>[3.26-12.28] | 6.89<br>[4.15-12.95] | 6.51 [2.93, 10.86]  | 1.95 [1.13, 3.63]    | 2.77 [1.66, 10.28] | 4.84 [3.92, 10.97]   | 2.67 [1.82, 5.07]    | 2.85 [1.99, 6.04]    |
| <b>A090</b> | 0.01<br>[0-0.04]    | 0.02<br>[0.01-0.07]  | 0.03<br>[0.01-0.08]  | 0.54 [0.03, 0.82]   | 0.2 [0.04, 0.64]     | 0.12 [0.04, 0.42]  | 0.1 [0.03, 0.29]     | 0.11 [0.07, 0.33]    | 0.04 [0.01, 0.13]    |
| <b>A091</b> | 0.01<br>[0-0.02]    | 0.01<br>[0-0.04]     | 0.01<br>[0-0.04]     | 0.17 [0.03, 0.53]   | 0.07 [0.02, 0.45]    | 0.12 [0.03, 0.27]  | 0.13 [0.07, 0.4]     | 0.03 [0.02, 0.32]    | 0.06 [0.03, 0.23]    |
| <b>A092</b> | 0.01<br>[0-0.04]    | 0.01<br>[0-0.02]     | 0.01<br>[0-0.03]     | 0.08 [0.03, 0.4]    | 0.11 [0.02, 0.22]    | 0.03 [0.02, 0.2]   | 0.04 [0.02, 0.21]    | 0.02 [0.02, 0.12]    | 0.04 [0.01, 0.26]    |
| <b>A093</b> | 0<br>[0-0.01]       | 0.01<br>[0-0.02]     | 0.01<br>[0-0.03]     | 0.03 [0.02, 0.09]   | 0.02 [0.01, 0.03]    | 0 [0, 0.01]        | 0.02 [0.01, 0.05]    | 0.01 [0.01, 0.03]    | 0.02 [0.01, 0.03]    |
| <b>A094</b> | 0<br>[0-0.01]       | 0.01<br>[0-0.03]     | 0<br>[0-0.01]        | 0.02 [0.02, 0.35]   | 0.02 [0.01, 0.07]    | 0.02 [0, 0.06]     | 0.02 [0.01, 0.06]    | 0.02 [0.01, 0.07]    | 0.01 [0.01, 0.06]    |
| <b>A095</b> | 0.19<br>[0.11-0.3]  | 0.09<br>[0.03-0.19]  | 0.1<br>[0.04-0.2]    | 1.93 [0.7, 4.18]    | 1.16 [0.11, 1.69]    | 0.25 [0.09, 0.59]  | 0.85 [0.19, 2.83]    | 0.33 [0.13, 1.54]    | 0.37 [0.04, 1.59]    |
| <b>A096</b> | 0.21<br>[0.04-0.49] | 0.25<br>[0.04-1.16]  | 0.5<br>[0.04-0.81]   | 0.04 [0.02, 0.31]   | 0.02 [0.01, 0.07]    | 0.05 [0.01, 0.19]  | 0.07 [0.02, 0.21]    | 0.05 [0.02, 0.23]    | 0.04 [0.01, 0.22]    |
| <b>A097</b> | 0.32<br>[0.12-0.65] | 0.25<br>[0.07-0.59]  | 0.36<br>[0.13-0.74]  | 8.87 [3.44, 15.66]  | 3.6 [1.59, 10.01]    | 1.79 [0.45, 6.21]  | 1.96 [0.61, 5.12]    | 1.56 [0.19, 7.58]    | 1.15 [0.22, 5.62]    |
| <b>A098</b> | 0.36<br>[0.16-1.34] | 0.27<br>[0.08-1.06]  | 0.18<br>[0.05-0.61]  | 1.73 [0.24, 5.17]   | 2.45 [0.48, 3.89]    | 0.65 [0.33, 1.35]  | 0.51 [0.21, 1.27]    | 0.64 [0.2, 4.01]     | 0.54 [0.12, 2.71]    |
| <b>A099</b> | 1.88<br>[1.13-3.17] | 1.84<br>[0.99-3.34]  | 1.89<br>[1.17-3.18]  | 10.07 [4.16, 22.67] | 3.73 [1.01, 19.35]   | 7.88 [2.32, 20.48] | 1.57 [0.74, 15.26]   | 2.34 [0.81, 10.41]   | 2.86 [0.97, 10.35]   |
| <b>A100</b> | 0.12<br>[0.05-0.21] | 0.07<br>[0.02-0.24]  | 0.04<br>[0.01-0.16]  | 0.67 [0.13, 1.5]    | 0.42 [0.05, 1.07]    | 0.35 [0.15, 2.15]  | 0.1 [0.04, 0.82]     | 0.23 [0.03, 0.86]    | 0.16 [0.07, 0.32]    |
| <b>A101</b> | 0.38<br>[0.18-0.78] | 0.52<br>[0.24-0.85]  | 0.59<br>[0.27-1.11]  | 6.08 [2.16, 11.3]   | 2.3 [0.75, 6.69]     | 3.29 [1.11, 5.96]  | 2.55 [0.55, 5.53]    | 3.05 [0.77, 3.95]    | 1.02 [0.42, 9.41]    |
| <b>A102</b> | 0.91<br>[0.6-1.72]  | 1.3<br>[0.66-2.5]    | 1.32<br>[0.74-2.17]  | 5.67 [1.61, 10.64]  | 2.51 [1.53, 6.5]     | 3.84 [0.95, 8.83]  | 4.78 [0.56, 11.34]   | 2.53 [1.35, 4.45]    | 1.97 [1.23, 11.43]   |
| <b>A103</b> | 0.05<br>[0.01-0.12] | 0.02<br>[0.01-0.04]  | 0.02<br>[0.01-0.1]   | 0.49 [0.08, 1.5]    | 0.32 [0.12, 0.85]    | 0.09 [0.04, 0.33]  | 0.24 [0.03, 1.5]     | 0.25 [0.04, 0.62]    | 0.09 [0.02, 0.41]    |
| <b>A104</b> | 0.55<br>[0.31-1.09] | 0.77<br>[0.34-1.87]  | 0.91<br>[0.52-1.77]  | 2.04 [0.66, 3.54]   | 0.73 [0.36, 1.41]    | 1.07 [0.29, 2.13]  | 1.5 [0.57, 5.09]     | 1.5 [0.78, 2.39]     | 0.66 [0.39, 1.71]    |
| <b>A105</b> | 0.48<br>[0.27-1.1]  | 1.01<br>[0.39-1.72]  | 0.86<br>[0.41-1.63]  | 1.9 [0.67, 3.03]    | 0.77 [0.43, 1.77]    | 0.52 [0.22, 2.85]  | 0.95 [0.47, 2.61]    | 1.29 [0.37, 1.9]     | 0.55 [0.22, 1]       |

Values inside the bracket are 1st and 3rd quartiles. Median and quartile values in the tables were indicated by multiplying  $10^3$ . Cord blood samples were classified by 3 conditions [i.e., healthy full-term, preterm without BPD ['No BPD'], and preterm with BPD ['BPD']]. Peripheral blood samples were classified by infant age at time of collection [1-week, 1-month, and 36-weeks postmenstrual age]. Timepoints were stratified by BPD status. *Red boxes* highlight BPD levels across the 4 timepoints: cord blood, 1-week, 1-month and 36-weeks PMA.
